# Supplementary material
Source: PubMed Central journal article supplement (PMC4154234)
Supplement: NIHMS617297-supplement-Suppl__Figures.pdf [file NIHMS617297-supplement-Suppl__Figures.pdf]

## Supplemental Figure 1

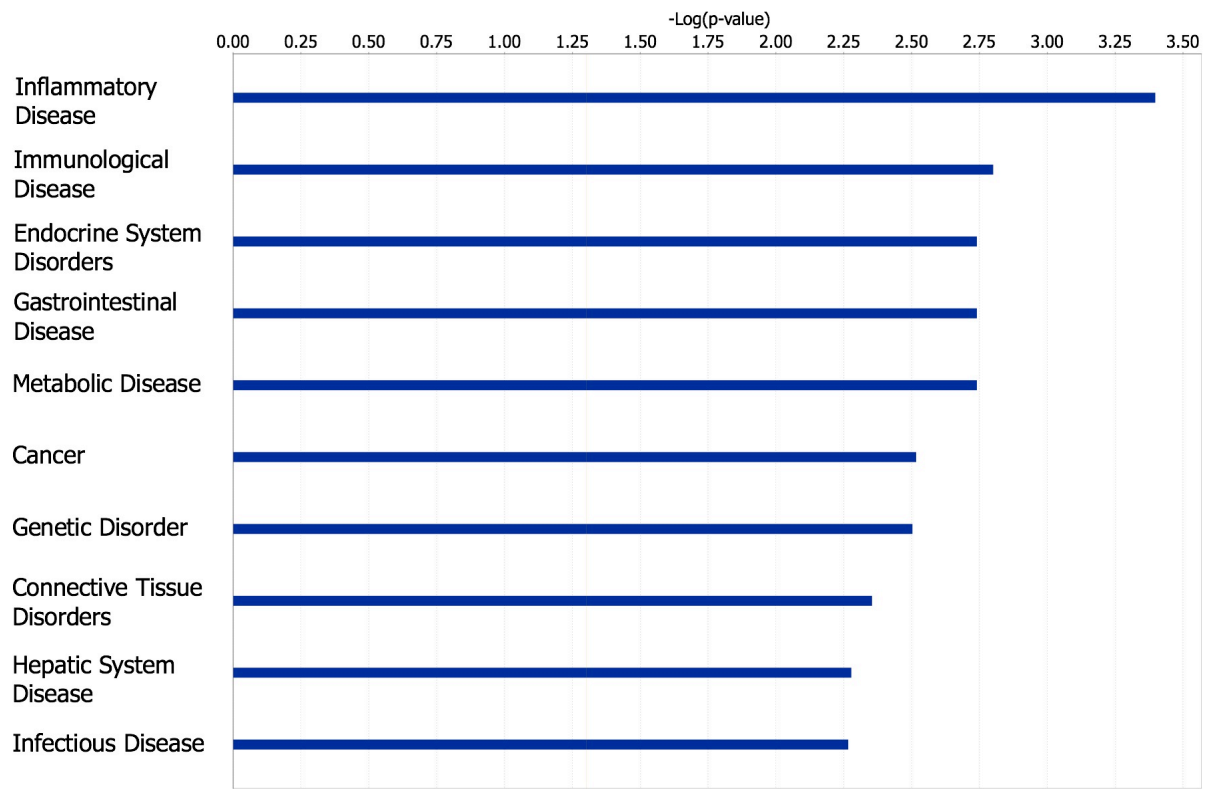

**Supplemental Figure 1. Biological function enrichment analysis of all miR-375 regulated genes.** Ingenuity analysis of the most significant diseases and disorders represented by all genes differentially regulated by miR-375.

Supplemental Figure 2

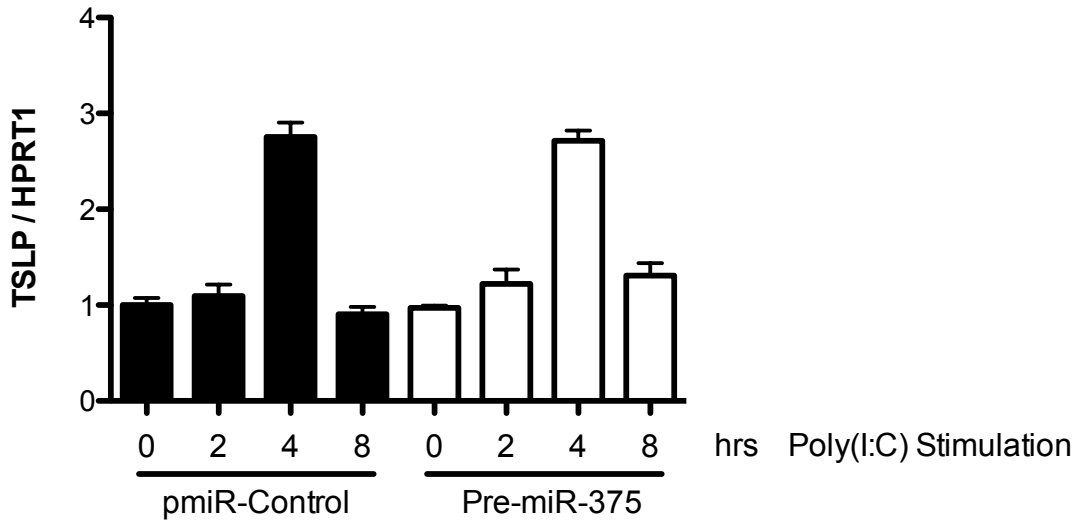

**Supplemental Figure 2. Expression level of TSLP in poly(I:C) stimulated pre-miR-375 transduced TE-7 esophageal epithelial cells compared to controls. (A)** Levels of TSLP in control transduced and pre-miR-375 transduced TE-7 cells after stimulation with 25  $\mu\text{g}/\text{mL}$  poly(I:C) for 0, 2, 4, 8 hours. Expression level determined by qPCR normalized to HPRT1. N = 4 per group; data are represented as mean  $\pm$  S.E.M.
