# Supplementary material
Source: PubMed Central journal article supplement (PMC4154234)
Supplement: NIHMS617297-supplement-Suppl__Table_I.pdf [file NIHMS617297-supplement-Suppl__Table_I.pdf]

Supplemental Table 1. List of genes differentially regulated by miR-375 in esophageal epithelial cells before and after IL-13 stimulation

| <b>Transcript ID</b> | <b>Gene Symbol</b>     | <b>Gene Description</b>                                                             | <b>Regulation</b>                |
|----------------------|------------------------|-------------------------------------------------------------------------------------|----------------------------------|
| 7900129              | C1orf113IFAM176B       | chromosome 1 open reading frame 113 l family with sequence similarity 176, member B | Repressed by miR-375 at Baseline |
| 7905339              | GABPB2                 | GA binding protein transcription factor, beta subunit 2                             | Repressed by miR-375 at Baseline |
| 7907531              | GPR52                  | G protein-coupled receptor 52                                                       | Repressed by miR-375 at Baseline |
| 7910379              | DUSP5P                 | dual specificity phosphatase 5 pseudogene                                           | Repressed by miR-375 at Baseline |
| 7914322              | SNORD103A<br>SNORD103B | small nucleolar RNA, C/D box 103A l small nucleolar RNA, C/D box 103B               | Repressed by miR-375 at Baseline |
| 7914324              | SNORD103A<br>SNORD103B | small nucleolar RNA, C/D box 103A l small nucleolar RNA, C/D box 103B               | Repressed by miR-375 at Baseline |
| 7920664              | THBS3                  | thrombospondin 3                                                                    | Repressed by miR-375 at Baseline |
| 7920852              | KIAA0907               | KIAA0907                                                                            | Repressed by miR-375 at Baseline |
| 7934278              | P4HA1                  | prolyl 4-hydroxylase, alpha polypeptide I                                           | Repressed by miR-375 at Baseline |
| 7942332              | FOLR1                  | folate receptor 1 (adult)                                                           | Repressed by miR-375 at Baseline |
| 7944867              | SIAE                   | sialic acid acetyltransferase                                                       | Repressed by miR-375 at Baseline |
| 7951297              | MMP12                  | matrix metalloproteinase 12 (macrophage elastase)                                   | Repressed by miR-375 at Baseline |
| 7954208              | PIK3C2G                | phosphoinositide-3-kinase, class 2, gamma polypeptide                               | Repressed by miR-375 at Baseline |
| 7956038              | MMP19<br>LOC440104     | matrix metalloproteinase 19 l hypothetical LOC440104                                | Repressed by miR-375 at Baseline |
| 7956876              | LLPH                   | LLP homolog, long-term synaptic facilitation (Aplysia)                              | Repressed by miR-375 at Baseline |
| 7963261              | LOC494150              | prohibitin pseudogene                                                               | Repressed by miR-375 at Baseline |
| 7964119              | STAT2                  | signal transducer and activator of transcription 2, 113kDa                          | Repressed by miR-375 at Baseline |
| 7967210              | LOC338799              | LOC338799                                                                           | Repressed by miR-375 at Baseline |

|         |                                     |                                                                                                                                                                                                                                                                             |                                  |
|---------|-------------------------------------|-----------------------------------------------------------------------------------------------------------------------------------------------------------------------------------------------------------------------------------------------------------------------------|----------------------------------|
| 7971461 | LCP1                                | lymphocyte cytosolic protein 1 (L-plastin)                                                                                                                                                                                                                                  | Repressed by miR-375 at Baseline |
| 7978718 | SEC23A                              | Sec23 homolog A ( <i>S. cerevisiae</i> )                                                                                                                                                                                                                                    | Repressed by miR-375 at Baseline |
| 7994582 | SULT1A3IGIYD1IGIYD2ISULT1A2ISULT1A4 | sulfotransferase family, cytosolic, 1A, phenol-preferring, member 3   GIY-YIG domain containing 1   GIY-YIG domain containing 2   sulfotransferase family, cytosolic, 1A, phenol-preferring, member 2   sulfotransferase family, cytosolic, 1A, phenol-preferring, member 4 | Repressed by miR-375 at Baseline |
| 7994781 | SULT1A3IGIYD1IGIYD2ISULT1A2ISULT1A4 | sulfotransferase family, cytosolic, 1A, phenol-preferring, member 3   GIY-YIG domain containing 1   GIY-YIG domain containing 2   sulfotransferase family, cytosolic, 1A, phenol-preferring, member 2   sulfotransferase family, cytosolic, 1A, phenol-preferring, member 4 | Repressed by miR-375 at Baseline |
| 7996430 | HSF4IFBXL8                          | heat shock transcription factor 4   F-box and leucine-rich repeat protein 8                                                                                                                                                                                                 | Repressed by miR-375 at Baseline |
| 7998664 | SNORA10                             | small nucleolar RNA, H/ACA box 10                                                                                                                                                                                                                                           | Repressed by miR-375 at Baseline |
| 8000757 | DOC2AIINO80E                        | double C2-like domains, alpha   INO80 complex subunit E                                                                                                                                                                                                                     | Repressed by miR-375 at Baseline |
| 8000799 | GDPD3                               | glycerophosphodiester phosphodiesterase domain containing 3                                                                                                                                                                                                                 | Repressed by miR-375 at Baseline |
| 8013364 | SLC47A2                             | solute carrier family 47, member 2                                                                                                                                                                                                                                          | Repressed by miR-375 at Baseline |
| 8013622 | SGK494IFLJ25006                     | uncharacterized serine/threonine-protein kinase SgK494                                                                                                                                                                                                                      | Repressed by miR-375 at Baseline |
| 8014903 | GSDMB                               | gasdermin B                                                                                                                                                                                                                                                                 | Repressed by miR-375 at Baseline |
| 8016259 | LRRC37A2ILRRC37A3ILO100294335       | leucine rich repeat containing 37, member A2   leucine rich repeat containing 37A   leucine rich repeat containing 37, member A3   similar to c114 SLIT-like testicular protein                                                                                             | Repressed by miR-375 at Baseline |
| 8031176 | LENG8                               | leukocyte receptor cluster (LRC) member 8                                                                                                                                                                                                                                   | Repressed by miR-375 at Baseline |
| 8032249 | ADAMTSL5                            | ADAMTS-like 5                                                                                                                                                                                                                                                               | Repressed by miR-375 at Baseline |
| 8033257 | C3                                  | complement component 3                                                                                                                                                                                                                                                      | Repressed by miR-375 at Baseline |

|         |                 |                                                                                                                             |                                  |
|---------|-----------------|-----------------------------------------------------------------------------------------------------------------------------|----------------------------------|
| 8041204 | SNORA10         | small nucleolar RNA, H/ACA box 10                                                                                           | Repressed by miR-375 at Baseline |
| 8044605 | LOC654433       | LOC654433                                                                                                                   | Repressed by miR-375 at Baseline |
| 8045539 | KYNU            | kynureninase (L-kynurenine hydrolase)                                                                                       | Repressed by miR-375 at Baseline |
| 8046906 | GULP1           | GULP, engulfment adaptor PTB domain containing 1                                                                            | Repressed by miR-375 at Baseline |
| 8048381 | STK36           | serine/threonine kinase 36, fused homolog (Drosophila)                                                                      | Repressed by miR-375 at Baseline |
| 8053200 | DQX1            | DEAQ box RNA-dependent ATPase 1                                                                                             | Repressed by miR-375 at Baseline |
| 8056151 | PLA2R1          | phospholipase A2 receptor 1, 180kDa                                                                                         | Repressed by miR-375 at Baseline |
| 8066786 | ZMYND8          | zinc finger, MYND-type containing 8                                                                                         | Repressed by miR-375 at Baseline |
| 8066822 | SULF2           | sulfatase 2                                                                                                                 | Repressed by miR-375 at Baseline |
| 8074577 | PI4KAP2 PI4KAP1 | phosphatidylinositol 4-kinase, catalytic, alpha pseudogene 2   phosphatidylinositol 4-kinase, catalytic, alpha pseudogene 1 | Repressed by miR-375 at Baseline |
| 8085716 | SATB1           | SATB homeobox 1                                                                                                             | Repressed by miR-375 at Baseline |
| 8086627 | ALS2CL          | ALS2 C-terminal like                                                                                                        | Repressed by miR-375 at Baseline |
| 8087433 | NICN1 AMT       | nicotin 1   aminomethyltransferase                                                                                          | Repressed by miR-375 at Baseline |
| 8092978 | MUC4            | mucin 4, cell surface associated                                                                                            | Repressed by miR-375 at Baseline |
| 8098441 | ODZ3            | odz, odd Oz/ten-m homolog 3 (Drosophila)                                                                                    | Repressed by miR-375 at Baseline |
| 8102792 | PCDH18          | protocadherin 18                                                                                                            | Repressed by miR-375 at Baseline |
| 8103853 | MGC45800        | hypothetical LOC90768                                                                                                       | Repressed by miR-375 at Baseline |
| 8105077 | CARD6           | caspase recruitment domain family, member 6                                                                                 | Repressed by miR-375 at Baseline |
| 8109086 | ADRB2           | adrenergic, beta-2-, receptor, surface                                                                                      | Repressed by miR-375 at Baseline |
| 8116921 | EDN1            | endothelin 1                                                                                                                | Repressed by miR-375 at Baseline |

|         |                                              |                                                                                                                                                                                                                                                          |                                  |
|---------|----------------------------------------------|----------------------------------------------------------------------------------------------------------------------------------------------------------------------------------------------------------------------------------------------------------|----------------------------------|
| 8117714 | OR2J3IOR2J1                                  | olfactory receptor, family 2, subfamily J, member 3   olfactory receptor, family 2, subfamily J, member 1                                                                                                                                                | Repressed by miR-375 at Baseline |
| 8124654 | GABBR1                                       | gamma-aminobutyric acid (GABA) B receptor, 1                                                                                                                                                                                                             | Repressed by miR-375 at Baseline |
| 8124691 | HCG8                                         | HLA complex group 8                                                                                                                                                                                                                                      | Repressed by miR-375 at Baseline |
| 8125687 | RGL2                                         | ral guanine nucleotide dissociation stimulator-like 2                                                                                                                                                                                                    | Repressed by miR-375 at Baseline |
| 8126018 | STK38                                        | serine/threonine kinase 38                                                                                                                                                                                                                               | Repressed by miR-375 at Baseline |
| 8126428 | TRERF1                                       | transcriptional regulating factor 1                                                                                                                                                                                                                      | Repressed by miR-375 at Baseline |
| 8133633 | NSUN5P2INSUN5P1<br>INSUN5BINSUN5CIT<br>RIM73 | NOP2/Sun domain family, member 5 pseudogene 2   NOP2/Sun domain family, member 5 pseudogene 1   NOL1/NOP2/Sun domain family, member 5B   NOL1/NOP2/Sun domain family, member 5   NOL1/NOP2/Sun domain family, member 5C   tripartite motif-containing 73 | Repressed by miR-375 at Baseline |
| 8140386 | STYXL1                                       | serine/threonine/tyrosine interacting-like 1                                                                                                                                                                                                             | Repressed by miR-375 at Baseline |
| 8148149 | ZHX2                                         | zinc fingers and homeoboxes 2                                                                                                                                                                                                                            | Repressed by miR-375 at Baseline |
| 8153550 | NRBP2                                        | nuclear receptor binding protein 2                                                                                                                                                                                                                       | Repressed by miR-375 at Baseline |
| 8156060 | TLE4                                         | transducin-like enhancer of split 4 (E(sp1) homolog, Drosophila)                                                                                                                                                                                         | Repressed by miR-375 at Baseline |
| 8157800 | MIR181A2                                     | microRNA 181a-2                                                                                                                                                                                                                                          | Repressed by miR-375 at Baseline |
| 8158862 | SNORD62AISNORD<br>62B                        | small nucleolar RNA, C/D box 62A   small nucleolar RNA, C/D box 62B                                                                                                                                                                                      | Repressed by miR-375 at Baseline |
| 8158864 | SNORD62AISNORD<br>62B                        | small nucleolar RNA, C/D box 62A   small nucleolar RNA, C/D box 62B                                                                                                                                                                                      | Repressed by miR-375 at Baseline |
| 8161373 | LOC100289528                                 | LOC100289528                                                                                                                                                                                                                                             | Repressed by miR-375 at Baseline |
| 8161554 | LOC100289528                                 | LOC100289528                                                                                                                                                                                                                                             | Repressed by miR-375 at Baseline |
| 8170921 | PLXNA3                                       | plexin A3                                                                                                                                                                                                                                                | Repressed by miR-375 at Baseline |

|         |                       |                                                                                                                                             |                                  |
|---------|-----------------------|---------------------------------------------------------------------------------------------------------------------------------------------|----------------------------------|
| 8175666 | GABRE                 | gamma-aminobutyric acid (GABA) A receptor, epsilon                                                                                          | Repressed by miR-375 at Baseline |
| 8177694 | OR2J3IOR2J1           | olfactory receptor, family 2, subfamily J, member 3   olfactory receptor, family 2, subfamily J, member 1                                   | Repressed by miR-375 at Baseline |
| 8178298 | GABBR1                | gamma-aminobutyric acid (GABA) B receptor, 1                                                                                                | Repressed by miR-375 at Baseline |
| 8178955 | RGL2                  | ral guanine nucleotide dissociation stimulator-like 2                                                                                       | Repressed by miR-375 at Baseline |
| 8179003 | OR2J3IOR2J1           | olfactory receptor, family 2, subfamily J, member 3   olfactory receptor, family 2, subfamily J, member 1                                   | Repressed by miR-375 at Baseline |
| 8179595 | GABBR1                | gamma-aminobutyric acid (GABA) B receptor, 1                                                                                                | Repressed by miR-375 at Baseline |
| 8180144 | RGL2                  | ral guanine nucleotide dissociation stimulator-like 2                                                                                       | Repressed by miR-375 at Baseline |
| 7904364 | WDR3                  | WD repeat domain 3                                                                                                                          | Induced by miR-375 at baseline   |
| 7916219 | C1orf163              | chromosome 1 open reading frame 163                                                                                                         | Induced by miR-375 at baseline   |
| 7927267 | FAM35BIFAM35B2IFAM35A | family with sequence similarity 35, member B   family with sequence similarity 35, member B2   family with sequence similarity 35, member A | Induced by miR-375 at baseline   |
| 7927288 | FAM35B2IFAM35A        | family with sequence similarity 35, member B2   family with sequence similarity 35, member B   family with sequence similarity 35, member A | Induced by miR-375 at baseline   |
| 7929072 | IFIT5                 | interferon-induced protein with tetratricopeptide repeats 5                                                                                 | Induced by miR-375 at baseline   |
| 7932765 | MPP7                  | membrane protein, palmitoylated 7 (MAGUK p55 subfamily member 7)                                                                            | Induced by miR-375 at baseline   |
| 7935707 | CHUK                  | conserved helix-loop-helix ubiquitous kinase                                                                                                | Induced by miR-375 at baseline   |
| 7944656 | SC5DL                 | sterol-C5-desaturase (ERG3 delta-5-desaturase homolog, <i>S. cerevisiae</i> )-like                                                          | Induced by miR-375 at baseline   |
| 7945169 | TMEM45B               | transmembrane protein 45B                                                                                                                   | Induced by miR-375 at baseline   |
| 7948908 | SNORD26ISNHG1         | small nucleolar RNA, C/D box 26   small nucleolar RNA host gene 1 (non-protein coding)                                                      | Induced by miR-375 at baseline   |

|         |                                                                                                                              |                                                                                                                                                                                                                                                                                                                                                                                                                                                |                                |
|---------|------------------------------------------------------------------------------------------------------------------------------|------------------------------------------------------------------------------------------------------------------------------------------------------------------------------------------------------------------------------------------------------------------------------------------------------------------------------------------------------------------------------------------------------------------------------------------------|--------------------------------|
| 8059026 | MIR375                                                                                                                       | microRNA 375                                                                                                                                                                                                                                                                                                                                                                                                                                   | Induced by miR-375 at baseline |
| 7951036 | SNORD5 TAF1D                                                                                                                 | small nucleolar RNA, C/D box 5   TATA box binding protein (TBP)-associated factor, RNA polymerase I, D, 41kDa                                                                                                                                                                                                                                                                                                                                  | Induced by miR-375 at baseline |
| 7981964 | SNORD116-8 SNORD116-3 SNORD116-9                                                                                             | small nucleolar RNA, C/D box 116-8   small nucleolar RNA, C/D box 116-3   small nucleolar RNA, C/D box 116-9                                                                                                                                                                                                                                                                                                                                   | Induced by miR-375 at baseline |
| 7981976 | SNORD116-14                                                                                                                  | small nucleolar RNA, C/D box 116-14                                                                                                                                                                                                                                                                                                                                                                                                            | Induced by miR-375 at baseline |
| 7981978 | SNORD116-15                                                                                                                  | small nucleolar RNA, C/D box 116-15                                                                                                                                                                                                                                                                                                                                                                                                            | Induced by miR-375 at baseline |
| 7981982 | SNORD116-17 SNORD116-19 SNORD116-15 SNORD116-16 SNORD116-18 SNORD116-21 SNORD116-22 SNORD116-14 SNORD116-20 SNORD116@ SN RPN | small nucleolar RNA, C/D box 116-17   small nucleolar RNA, C/D box 116-19   small nucleolar RNA, C/D box 116-15   small nucleolar RNA, C/D box 116-16   small nucleolar RNA, C/D box 116-18   small nucleolar RNA, C/D box 116-21   small nucleolar RNA, C/D box 116-22   small nucleolar RNA, C/D box 116-14   small nucleolar RNA, C/D box 116-20   small nucleolar RNA, C/D box 116 cluster   small nuclear ribonucleoprotein polypeptide N | Induced by miR-375 at baseline |
| 7981986 | SNORD116-17 SNORD116-19 SNORD116-15 SNORD116-16 SNORD116-18 SNORD116-21 SNORD116-22 SNORD116-14 SNORD116-20 SNORD116@ SN RPN | small nucleolar RNA, C/D box 116-17   small nucleolar RNA, C/D box 116-19   small nucleolar RNA, C/D box 116-15   small nucleolar RNA, C/D box 116-16   small nucleolar RNA, C/D box 116-18   small nucleolar RNA, C/D box 116-21   small nucleolar RNA, C/D box 116-22   small nucleolar RNA, C/D box 116-14   small nucleolar RNA, C/D box 116-20   small nucleolar RNA, C/D box 116 cluster   small nuclear ribonucleoprotein polypeptide N | Induced by miR-375 at baseline |
| 7981988 | SNORD116-20 SNORD116@                                                                                                        | small nucleolar RNA, C/D box 116-20   small nucleolar RNA, C/D box 116 cluster                                                                                                                                                                                                                                                                                                                                                                 | Induced by miR-375 at baseline |
| 7981996 | SNORD116-24                                                                                                                  | small nucleolar RNA, C/D box 116-24                                                                                                                                                                                                                                                                                                                                                                                                            | Induced by miR-375 at baseline |
| 8006634 | PIGW                                                                                                                         | phosphatidylinositol glycan anchor biosynthesis, class W                                                                                                                                                                                                                                                                                                                                                                                       | Induced by miR-375 at baseline |
| 8009380 | SNORA38B                                                                                                                     | small nucleolar RNA, H/ACA box 38B (retrotransposed)                                                                                                                                                                                                                                                                                                                                                                                           | Induced by miR-375 at baseline |

|         |                        |                                                                                                          |                                              |
|---------|------------------------|----------------------------------------------------------------------------------------------------------|----------------------------------------------|
| 8106193 | UTP15                  | U3 small nucleolar RNA-associated protein 15 homolog                                                     | Induced by miR-375 at baseline               |
| 8122440 | LTV1                   | yeast LTV1 Homolog                                                                                       | Induced by miR-375 at baseline               |
| 8132897 | LANCL2                 | LanC lantibiotic synthetase component C-like 2 (bacterial)                                               | Induced by miR-375 at baseline               |
| 8132922 | MRPS17IGBASIZNF713     | mitochondrial ribosomal protein S17 l glioblastoma amplified sequence l zinc finger protein 713          | Induced by miR-375 at baseline               |
| 8146685 | RRS1                   | homolog of yeast ribosome biogenesis regulatory protein RRS1                                             | Induced by miR-375 at baseline               |
| 8146921 | RDH10                  | retinol dehydrogenase 10 (all-trans)                                                                     | Induced by miR-375 at baseline               |
| 8150537 | SLC20A2                | solute carrier family 20 (phosphate transporter), member 2                                               | Induced by miR-375 at baseline               |
| 8150908 | IMPAD1                 | inositol monophosphatase domain containing 1                                                             | Induced by miR-375 at baseline               |
| 7904106 | MAGI3                  | membrane associated guanylate kinase, WW and PDZ domain containing 3                                     | miR-375 Antagonizes IL-13 mediated induction |
| 7908204 | HMCN1                  | hemicentin 1                                                                                             | miR-375 Antagonizes IL-13 mediated induction |
| 7917912 | DPYD                   | dihydropyrimidine dehydrogenase                                                                          | miR-375 Antagonizes IL-13 mediated induction |
| 7920687 | GBAP1                  | glucosidase, beta, acid pseudogene 1                                                                     | miR-375 Antagonizes IL-13 mediated induction |
| 7968872 | DNAJC15                | DnaJ (Hsp40) homolog, subfamily C, member 15                                                             | miR-375 Antagonizes IL-13 mediated induction |
| 7985752 | NCRNA00052             | non-protein coding RNA 52                                                                                | miR-375 Antagonizes IL-13 mediated induction |
| 7988350 | DUOX2                  | dual oxidase 2                                                                                           | miR-375 Antagonizes IL-13 mediated induction |
| 8040249 | PDIA6IATP6V1C2         | protein disulfide isomerase family A, member 6 l ATPase, H+ transporting, lysosomal 42kDa, V1 subunit C2 | miR-375 Antagonizes IL-13 mediated induction |
| 8043036 | LOC1720                | dihydrofolate reductase pseudogene                                                                       | miR-375 Antagonizes IL-13 mediated induction |
| 8076113 | LOC646851IRP1-199H16.1 | similar to OTTHUMP00000028720                                                                            | miR-375 Antagonizes IL-13 mediated induction |
| 8130129 | NUP43                  | nucleoporin 43kDa                                                                                        | miR-375 Antagonizes IL-13 mediated induction |

|         |                |                                                                                                      |                                               |
|---------|----------------|------------------------------------------------------------------------------------------------------|-----------------------------------------------|
| 8140686 | SEMA3D         | sema domain, immunoglobulin domain (Ig), short basic domain, secreted, (semaphorin) 3D               | miR-375 Antagonizes IL-13 mediated induction  |
| 8140971 | SAMD9L         | sterile alpha motif domain containing 9-like                                                         | miR-375 Antagonizes IL-13 mediated induction  |
| 7905154 | C1orf51        | chromosome 1 open reading frame 51                                                                   | miR-375 Antagonizes IL-13 mediated Repression |
| 7925062 | SIPA1L2        | signal-induced proliferation-associated 1 like 2                                                     | miR-375 Antagonizes IL-13 mediated Repression |
| 7938485 | MICAL2         | microtubule associated monooxygenase, calponin and LIM domain containing 2                           | miR-375 Antagonizes IL-13 mediated Repression |
| 8069795 | CLDN8          | claudin 8                                                                                            | miR-375 potentiates IL-13 mediated repression |
| 8020740 | DSG4           | desmoglein 4                                                                                         | miR-375 Antagonizes IL-13 mediated Repression |
| 8042283 | HSPC159        | galectin-related protein                                                                             | miR-375 Antagonizes IL-13 mediated Repression |
| 8056005 | ACVR1          | activin A receptor, type I                                                                           | miR-375 Antagonizes IL-13 mediated Repression |
| 8102800 | SLC7A11        | solute carrier family 7, (cationic amino acid transporter, y+ system) member 11                      | miR-375 Antagonizes IL-13 mediated Repression |
| 8115623 | ATP10B         | ATPase, class V, type 10B                                                                            | miR-375 Antagonizes IL-13 mediated Repression |
| 8164215 | SNORA65        | small nucleolar RNA, H/ACA box 65                                                                    | miR-375 Antagonizes IL-13 mediated Repression |
| 7927936 | DDX21          | DEAD (Asp-Glu-Ala-Asp) box polypeptide 21                                                            | miR-375 potentiates IL-13 mediated induction  |
| 7929047 | IFIT2          | interferon-induced protein with tetratricopeptide repeats 2                                          | miR-375 potentiates IL-13 mediated induction  |
| 7938702 | DKFZp686O24166 | DKFZp686O24166                                                                                       | miR-375 potentiates IL-13 mediated induction  |
| 7954382 | PYROXD1IRECQL  | pyridine nucleotide-disulphide oxidoreductase domain 1   RecQ protein-like (DNA helicase Q1-like)    | miR-375 potentiates IL-13 mediated induction  |
| 8042830 | MTHFD2         | methylenetetrahydrofolate dehydrogenase (NADP+ dependent) 2, methenyltetrahydrofolate cyclohydrolase | miR-375 potentiates IL-13 mediated induction  |
| 8047788 | ADAM23         | ADAM metallopeptidase domain 23                                                                      | miR-375 potentiates IL-13 mediated induction  |



|         |              |                                                                                                      |                                               |
|---------|--------------|------------------------------------------------------------------------------------------------------|-----------------------------------------------|
| 8062211 | RPF2IBXDC1   | ribosome production factor 2 homolog (S. cerevisiae) I brix domain containing 1                      | miR-375 potentiates IL-13 mediated induction  |
| 8069532 | HSPA13       | heat shock protein 70kDa family, member 13                                                           | miR-375 potentiates IL-13 mediated induction  |
| 8084064 | MTHFD2       | methylenetetrahydrofolate dehydrogenase (NADP+ dependent) 2, methenyltetrahydrofolate cyclohydrolase | miR-375 potentiates IL-13 mediated induction  |
| 8135774 | PTPRZ1       | protein tyrosine phosphatase, receptor-type, Z polypeptide 1                                         | miR-375 potentiates IL-13 mediated induction  |
| 8142540 | FAM3C        | family with sequence similarity 3, member C                                                          | miR-375 potentiates IL-13 mediated induction  |
| 8166442 | FAM3C        | family with sequence similarity 3, member C                                                          | miR-375 potentiates IL-13 mediated induction  |
| 8171248 | KAL1         | Kallmann syndrome 1 sequence                                                                         | miR-375 potentiates IL-13 mediated induction  |
| 7924450 | DUSP10       | dual specificity phosphatase 10                                                                      | miR-375 potentiates IL-13 mediated repression |
| 7962375 | PRICKLE1     | prickle homolog 1 (Drosophila)                                                                       | miR-375 potentiates IL-13 mediated repression |
| 8127563 | COL12A1      | collagen, type XII, alpha 1                                                                          | miR-375 potentiates IL-13 mediated repression |
| 8133688 | SNORA14A     | small nucleolar RNA, H/ACA box 14A                                                                   | miR-375 potentiates IL-13 mediated repression |
| 8175683 | MIR224 GABRE | microRNA 224   gamma-aminobutyric acid (GABA) A receptor, epsilon                                    | miR-375 potentiates IL-13 mediated repression |
| 7965403 | LUM          | lumican                                                                                              | miR-375 potentiates IL-13 mediated repression |
| 8026490 | UCA1         | urothelial cancer associated 1 (non-protein coding)                                                  | miR-375 potentiates IL-13 mediated repression |
| 8033674 | MUC16        | mucin 16, cell surface associated                                                                    | miR-375 potentiates IL-13 mediated repression |
| 8049123 | ALPP         | alkaline phosphatase, placental (Regan isozyme)                                                      | miR-375 potentiates IL-13 mediated repression |
| 8049128 | ALPPL2       | alkaline phosphatase, placental-like 2                                                               | miR-375 potentiates IL-13 mediated repression |
| 8058765 | FN1          | fibronectin 1                                                                                        | miR-375 potentiates IL-13 mediated repression |
| 8104693 | PDZD2        | PDZ domain containing 2                                                                              | miR-375 potentiates IL-13 mediated repression |
| 8126820 | GPR110       | G protein-coupled receptor 110                                                                       | miR-375 potentiates IL-13 mediated repression |
