# Supplementary material
Source: PubMed Central journal article supplement (PMC4154234)
Supplement: NIHMS617297-supplement-Suppl__Table_II.pdf [file NIHMS617297-supplement-Suppl__Table_II.pdf]

Supplemental Table 2.

List of miR-375 regulated genes that are involved in the immunoinflammatory responses

| Gene ID | Gene Symbol | Gene Description                                                                       | Disease Process       |
|---------|-------------|----------------------------------------------------------------------------------------|-----------------------|
| 90      | ACVR1       | Activin A receptor, type I                                                             | Inflammatory Diseases |
| 154     | ADRB2       | Adrenergic, beta-2-, receptor, surface                                                 | Inflammatory Diseases |
| 250     | ALPP        | Alkaline Phosphatase, placental                                                        | Inflammatory Diseases |
| 275     | AMT         | Aminomethyltransferase                                                                 | Inflammatory Diseases |
| 718     | C3          | Complement component 3                                                                 | Inflammatory Diseases |
| 1147    | CHUK        | Conserved helix-loop-helix ubiquitous kinase                                           | Inflammatory Diseases |
| 8448    | DOC2A       | Double C2-like domains, alpha                                                          | Inflammatory Diseases |
| 1806    | DPYD        | Dihydropyrimidine dehydrogenase                                                        | Inflammatory Diseases |
| 50506   | DUOX2       | Dual oxidase 2                                                                         | Inflammatory Diseases |
| 11221   | DUSP10      | Dual specificity phosphatase 10                                                        | Inflammatory Diseases |
| 2335    | FN1         | Fibronectin 1                                                                          | Inflammatory Diseases |
| 2550    | GABBR1      | Gamma-aminobutyric acid (GABA) B receptor, 1                                           | Inflammatory Diseases |
| 2564    | GABRE       | Gamma-aminobutyric acid (GABA) A receptor, epsilon                                     | Inflammatory Diseases |
| 55876   | GSDMB       | Gasdermin B                                                                            | Inflammatory Diseases |
| 8942    | KYNU        | Kynureninase (L-kynurenine hydrolase)                                                  | Inflammatory Diseases |
| 3936    | LCP1        | Lymphocyte cytosolic protein 1 (L-plastin)                                             | Inflammatory Diseases |
| 646851  | LOC646851   | Hypothetical LOC646851                                                                 | Inflammatory Diseases |
| 4060    | LUM         | Lumican                                                                                | Inflammatory Diseases |
| 260425  | MAGI3       | Membrane associated guanylate kinase, WW and PDZ domain containing 3                   | Inflammatory Diseases |
| 9645    | MICAL2      | Microtubule associated monooxygenase, calponin and LIM domain containing 2             | Inflammatory Diseases |
| 4321    | MMP12       | Matrix metalloproteinase 12 (macrophage elastase)                                      | Inflammatory Diseases |
| 143098  | MPP7        | Membrane protein, palmitoylated 7 (MAGUK p55 subfamily member 7)                       | Inflammatory Diseases |
| 84276   | NICN1       | Nicolin 1                                                                              | Inflammatory Diseases |
| 55714   | ODZ3        | Odz, odd Oz/ten-m homolog 3 (Drosophila)                                               | Inflammatory Diseases |
| 23037   | PDZD2       | PDZ domain containing 2                                                                | Inflammatory Diseases |
| 5288    | PIK3C2G     | Phosphoinositide-3-kinase, class 2, gamma polypeptide                                  | Inflammatory Diseases |
| 22925   | PLA2R1      | Phospholipase A2 receptor 1, 180kDa                                                    | Inflammatory Diseases |
| 144165  | PRICKLE1    | Prickle homolog 1 (Drosophila)                                                         | Inflammatory Diseases |
| 5803    | PTPRZ1      | Protein tyrosine phosphatase, receptor-type, Z polypeptide 1                           | Inflammatory Diseases |
| 5863    | RGL2        | Ral guanine nucleotide dissociation stimulator-like 2                                  | Inflammatory Diseases |
| 219285  | SAMD9L      | Sterile alpha motif domain containing 9-like                                           | Inflammatory Diseases |
| 223117  | SEMA3D      | Sema domain, immunoglobulin domain (Ig), short basic domain, secreted, (semaphorin) 3D | Inflammatory Diseases |

|        |           |                                                                                 |                        |
|--------|-----------|---------------------------------------------------------------------------------|------------------------|
| 23657  | SLC7A11   | Solute carrier family 7, (cationic amino acid transporter, y+ system) member 11 | Inflammatory Diseases  |
| 6638   | SNRPN     | Small nuclear ribonucleoprotein polypeptide N                                   | Inflammatory Diseases  |
| 27148  | STK36     | Serine/threonine kinase 36, fused homolog (Drosophila)                          | Inflammatory Diseases  |
| 55959  | SULF2     | Sulfatase 2                                                                     | Inflammatory Diseases  |
| 120224 | TMEM45B   | Transmembrane protein 45B                                                       | Inflammatory Diseases  |
| 84135  | UTP15     | UTP15, U3 small nucleolar ribonucleoprotein, homolog (S. cerevisiae)            | Inflammatory Diseases  |
| 22882  | ZHX2      | Zinc fingers and homeoboxes 2                                                   | Inflammatory Diseases  |
| 23613  | ZMYND8    | Zinc finger, MYND-type containing 8                                             | Inflammatory Diseases  |
| 8745   | ADAM23    | ADAM metallopeptidase domain 23                                                 | Immunological Diseases |
| 154    | ADRB2     | Adrenergic, beta-2-, receptor, surface                                          | Immunological Diseases |
| 718    | C3        | Complement component 3                                                          | Immunological Diseases |
| 1147   | CHUK      | Conserved helix-loop-helix ubiquitous kinase                                    | Immunological Diseases |
| 8448   | DOC2A     | Double C2-like domains, alpha                                                   | Immunological Diseases |
| 1806   | DPYD      | Dihydropyrimidine dehydrogenase                                                 | Immunological Diseases |
| 165545 | DQX1      | DEAQ box polypeptide 1 (RNA-dependent ATPase)                                   | Immunological Diseases |
| 11221  | DUSP10    | Dual specificity phosphatase 10                                                 | Immunological Diseases |
| 1906   | EDN1      | Endothelin 1                                                                    | Immunological Diseases |
| 2335   | FN1       | Fibronectin 1                                                                   | Immunological Diseases |
| 2550   | GABBR1    | Gamma-aminobutyric acid (GABA) B receptor, 1                                    | Immunological Diseases |
| 2553   | GABPB2    | GA binding protein transcription factor, beta subunit 2                         | Immunological Diseases |
| 2564   | GABRE     | Gamma-aminobutyric acid (GABA) A receptor, epsilon                              | Immunological Diseases |
| 3433   | IFIT2     | Interferon-induced protein with tetratricopeptide repeats 2                     | Immunological Diseases |
| 3936   | LCP1      | Lymphocyte cytosolic protein 1 (L-plastin)                                      | Immunological Diseases |
| 646851 | LOC646851 | Hypothetical LOC646851                                                          | Immunological Diseases |
| 260425 | MAGI3     | Membrane associated guanylate kinase, WW and PDZ domain containing 3            | Immunological Diseases |
| 9645   | MICAL2    | Microtubule associated monooxygenase, calponin and LIM domain containing 2      | Immunological Diseases |
| 143098 | MPP7      | Membrane protein, palmitoylated 7                                               | Immunological Diseases |
| 55714  | ODZ3      | Odz, odd Oz/ten-m homolog 3 (Drosophila)                                        | Immunological Diseases |
| 23037  | PDZD2     | PDZ domain containing 2                                                         | Immunological Diseases |
| 5288   | PIK3C2G   | Phosphoinositide-3-kinase, class 2, gamma polypeptide                           | Immunological Diseases |
| 22925  | PLA2R1    | Phospholipase A2 receptor 1, 180kDa                                             | Immunological Diseases |
| 144165 | PRICKLE1  | Prickle homolog 1 (Drosophila)                                                  | Immunological Diseases |
| 5863   | RGL2      | Ral guanine nucleotide dissociation stimulator-like 2                           | Immunological Diseases |
| 219285 | SAMD9L    | Sterile alpha motif domain containing 9-like                                    | Immunological Diseases |
| 57568  | SIPA1L2   | Signal-induced proliferation-associated 1 like 2                                | Immunological Diseases |

|       |         |                                                                                 |                        |
|-------|---------|---------------------------------------------------------------------------------|------------------------|
| 23657 | SLC7A11 | Solute carrier family 7, (cationic amino acid transporter, y+ system) member 11 | Immunological Diseases |
| 6638  | SNRPN   | Small nuclear ribonucleoprotein polypeptide N                                   | Immunological Diseases |
| 11329 | STK38   | Serine/threonine kinase 38                                                      | Immunological Diseases |
| 84135 | UTP15   | UTP15, U3 small nucleolar ribonucleoprotein, homolog (S. cerevisiae)            | Immunological Diseases |
| 22882 | ZHX2    | Zinc fingers and homeoboxes 2                                                   | Immunological Diseases |
